# Supplementary material for: Phytochemical Profile and Antioxidant Capacity of Coffee Plant Organs Compared to Green and Roasted Coffee Beans
Source: PubMed Central journal article supplement (PMC7070527; doi:10.3390/antiox9020093), 2020-01-22
Supplement: antioxidants-09-00093-s001.pdf [file antioxidants-09-00093-s001.pdf]

Table S1: Pearson's correlation coefficients amongst the measured parameters shown in tables 2, 3 and 4.

|                  | Yield  | TPC    | IC50   | DPPH   | ABTS   | FRAP   | Trigonelline | 5 – CQA | Caffeine | Mangiferin | Sucrose | 5 – CQA/Caffeine | HPLC Total | Chl a  | Chl b | Total Chl | Total Car | Chl a/b |  |
|------------------|--------|--------|--------|--------|--------|--------|--------------|---------|----------|------------|---------|------------------|------------|--------|-------|-----------|-----------|---------|--|
| TPC              | .35*   |        |        |        |        |        |              |         |          |            |         |                  |            |        |       |           |           |         |  |
| IC50             | -.69** | -.69** |        |        |        |        |              |         |          |            |         |                  |            |        |       |           |           |         |  |
| DPPH             | .76**  | .75**  | -.76** |        |        |        |              |         |          |            |         |                  |            |        |       |           |           |         |  |
| ABTS             | .80**  | .74**  | -.79** | .94**  |        |        |              |         |          |            |         |                  |            |        |       |           |           |         |  |
| FRAP             | .84**  | .57**  | -.75** | .87**  | .92**  |        |              |         |          |            |         |                  |            |        |       |           |           |         |  |
| Trigonelline     | .63**  | .30    | -.63** | .52**  | .61**  | .69**  |              |         |          |            |         |                  |            |        |       |           |           |         |  |
| 5 – CQA          | .29    | .63**  | -.65** | .51**  | .59**  | .64**  | .48**        |         |          |            |         |                  |            |        |       |           |           |         |  |
| Caffeine         | .58**  | .58**  | -.64** | .61**  | .65**  | .68**  | .77**        | .43**   |          |            |         |                  |            |        |       |           |           |         |  |
| Mangiferin       | .12    | .76**  | -.40*  | .46**  | .51**  | .44**  | .31          | .71**   | .48**    |            |         |                  |            |        |       |           |           |         |  |
| Sucrose          | .18    | .17    | -.36*  | .17    | .24    | .41*   | .34*         | .69**   | .32      | .25        |         |                  |            |        |       |           |           |         |  |
| 5 – CQA/Caffeine | -.57** | -.54** | .57**  | -.56** | -.57** | -.53** | -.39*        | -.33    | -.56**   | -.34*      | -.31    |                  |            |        |       |           |           |         |  |
| HPLC Total       | .39*   | .50**  | -.64** | .48**  | .56**  | .68**  | .62**        | .90**   | .61**    | .56**      | .88**   | -.44**           |            |        |       |           |           |         |  |
| Chl a            | .07    | .80**  | -.43** | .42*   | .48**  | .40*   | .36*         | .64**   | .61**    | .88**      | .24     | -.38*            | .55**      |        |       |           |           |         |  |
| Chl b            | .08    | .79**  | -.43** | .42*   | .48**  | .41*   | .39*         | .63**   | .61**    | .86**      | .24     | -.37*            | .56**      | .99**  |       |           |           |         |  |
| Total Chl        | .074   | .80**  | -.43** | .42*   | .48**  | .40*   | .37*         | .64**   | .61**    | .87**      | .24     | -.38*            | .56**      | .1.0** | .99** |           |           |         |  |
| Total Car        | .06    | .77**  | -.42*  | .39*   | .45**  | .37*   | .33*         | .59**   | .61**    | .84**      | .23     | -.37*            | .53**      | .98**  | .95** | .98**     |           |         |  |
| Chl a/b          | .07    | .79**  | -.44** | .43**  | .48**  | .39*   | .35*         | .63**   | .57**    | .88**      | .26     | -.38*            | .55**      | .97**  | .93** | .96**     | .97**     |         |  |
| Chl/Car          | .10    | .81**  | -.44** | .46**  | .51**  | .42*   | .41*         | .67**   | .57**    | .90**      | .27     | -.38*            | .58**      | .97**  | .98** | .98**     | .93**     | .95**   |  |

\*. Correlation is significant at the 0.05 level (2-tailed).

\*\* . Correlation is significant at the 0.01 level (2-tailed).
